# Supplementary material for: A high performance quasi-solid-state self-powered UV photodetector based on TiO2nanorod arrays
Source: Royal Society of Chemistry journal article supplement (doi:10.1039/c4nr01665c), 2014-06-30
Supplement: c4nr01665c1.pdf [file c4nr01665c1.pdf]

*Electronic Supplementary Information*

**High performance quasi-solid-state self-powered  
UV photodetector based on TiO<sub>2</sub> nanorod arrays**

**Yanru Xie,<sup>a</sup> Lin Wei,<sup>b</sup> Qinghao Li,<sup>a</sup> Yanxue Chen,<sup>\*a</sup> Hong Liu,<sup>\*c</sup> Shishen Yan,<sup>a</sup> Jun Jiao,<sup>d</sup>  
Guolei Liu<sup>a</sup> and Liangmo Mei<sup>a</sup>**

<sup>a</sup>School of Physics, Shandong University, Jinan, 250100, P. R. China. E-mail: cyx@sdu.edu.cn

<sup>b</sup>School of Information Science and Engineering, Shandong University, Jinan, 250100, P. R. China

<sup>c</sup>State Key Laboratory of Crystal Materials and Institute of Crystal Materials, Shandong University, Jinan, 250100, P. R. China.  
E-mail: hongliu@sdu.edu.cn

<sup>d</sup>Department of Mechanical & Materials Engineering, Department of Physics, Portland State University, Post Office Box 751,  
Portland, Oregon 97207-0751, USA

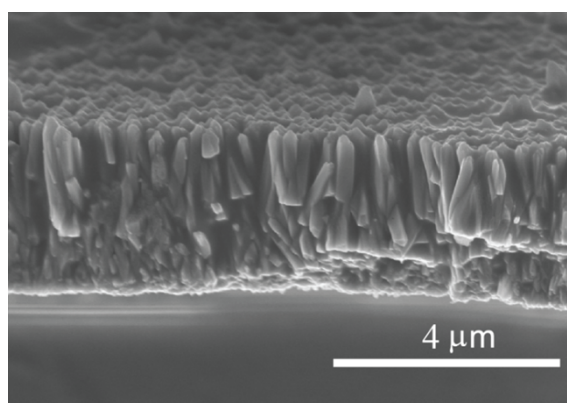

**Figure S1.** The SEM cross-section micrograph of TNAs coated with liquid crystal electrolyte after removing the solvent.

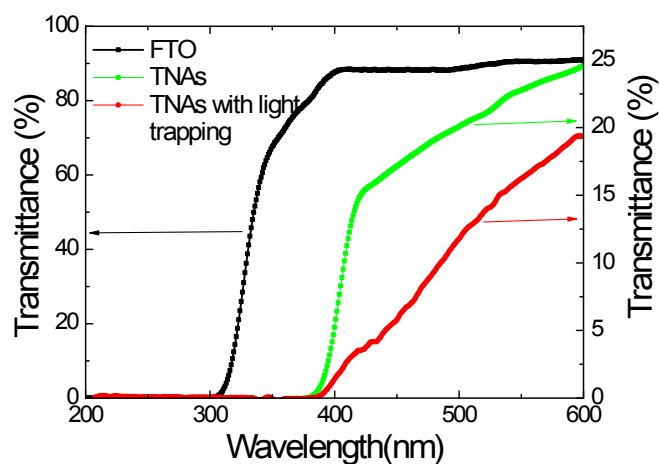

**Figure S2.** The transmission spectrum of FTO-glass, TNAs and TNAs with the quasi-solid-state electrolyte.

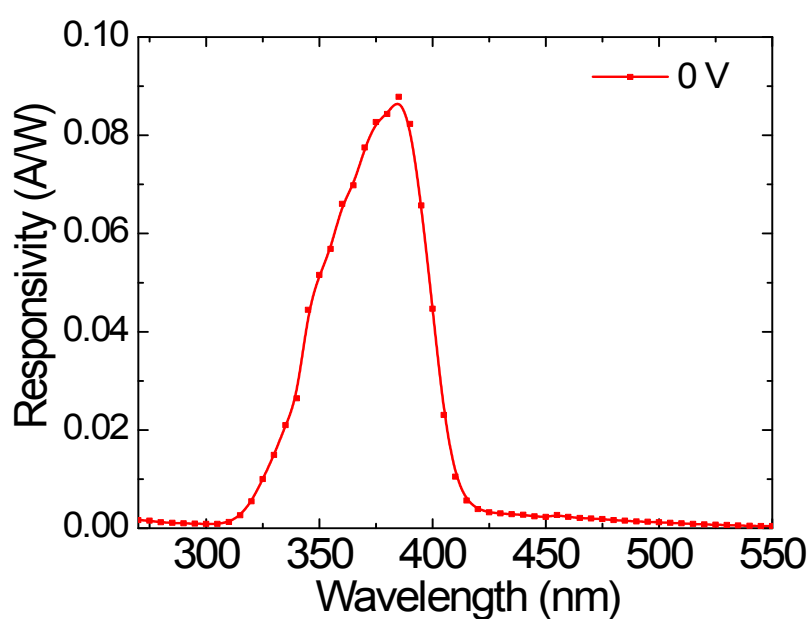

**Figure S3.** Spectral responsivity characteristic of the quasi-solid-state photodetector after being stored under ambient environment for 5 months

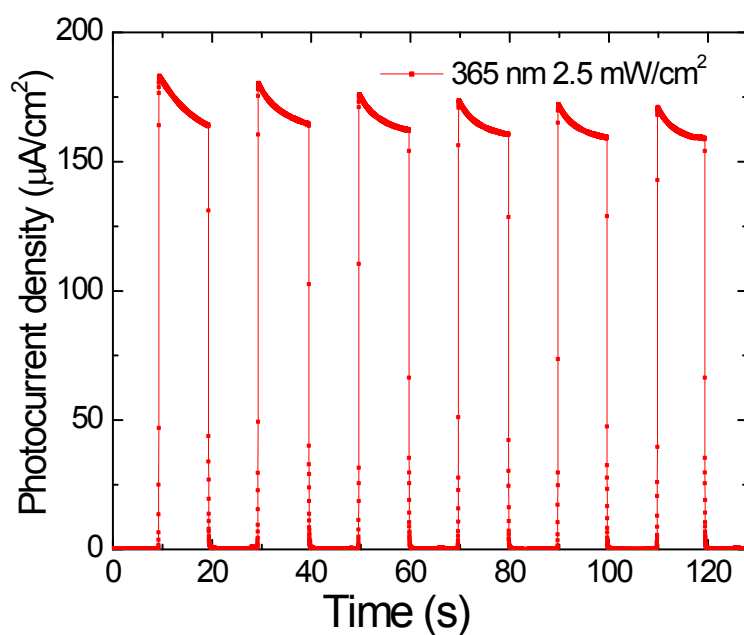

**Figure S4.** Incident light depended J-T characteristic of the quasi-solid-state photodetector after being stored under ambient environment for 5 months
